# Supplementary material
Source: PubMed Central journal article supplement (PMC7784082)
Supplement: NIHMS1545181-supplement-1.pdf [file NIHMS1545181-supplement-1.pdf]

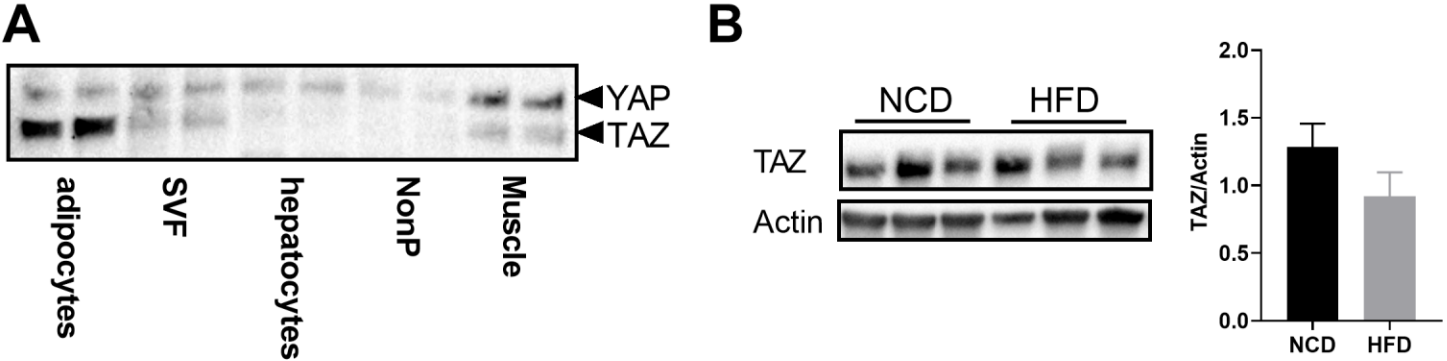

Figure S1. Related to Figure 1  
 (a) Immunoblot with antibody against YAP/TAZ to lysate from the indicated cells/tissues. (b) TAZ expression in NCD and HFD (12 weeks) mice (Values are expressed as mean  $\pm$  SEM, n=8 mice/group).  
 (d-f) Weight of sqWAT, BAT and fat mass in NCD mice. (g-i) Weight of sqWAT, BAT and fat mass in 12 weeks fed 60% high fat diet mice. Values are expressed as mean  $\pm$  SEM, n=6 mice/group.

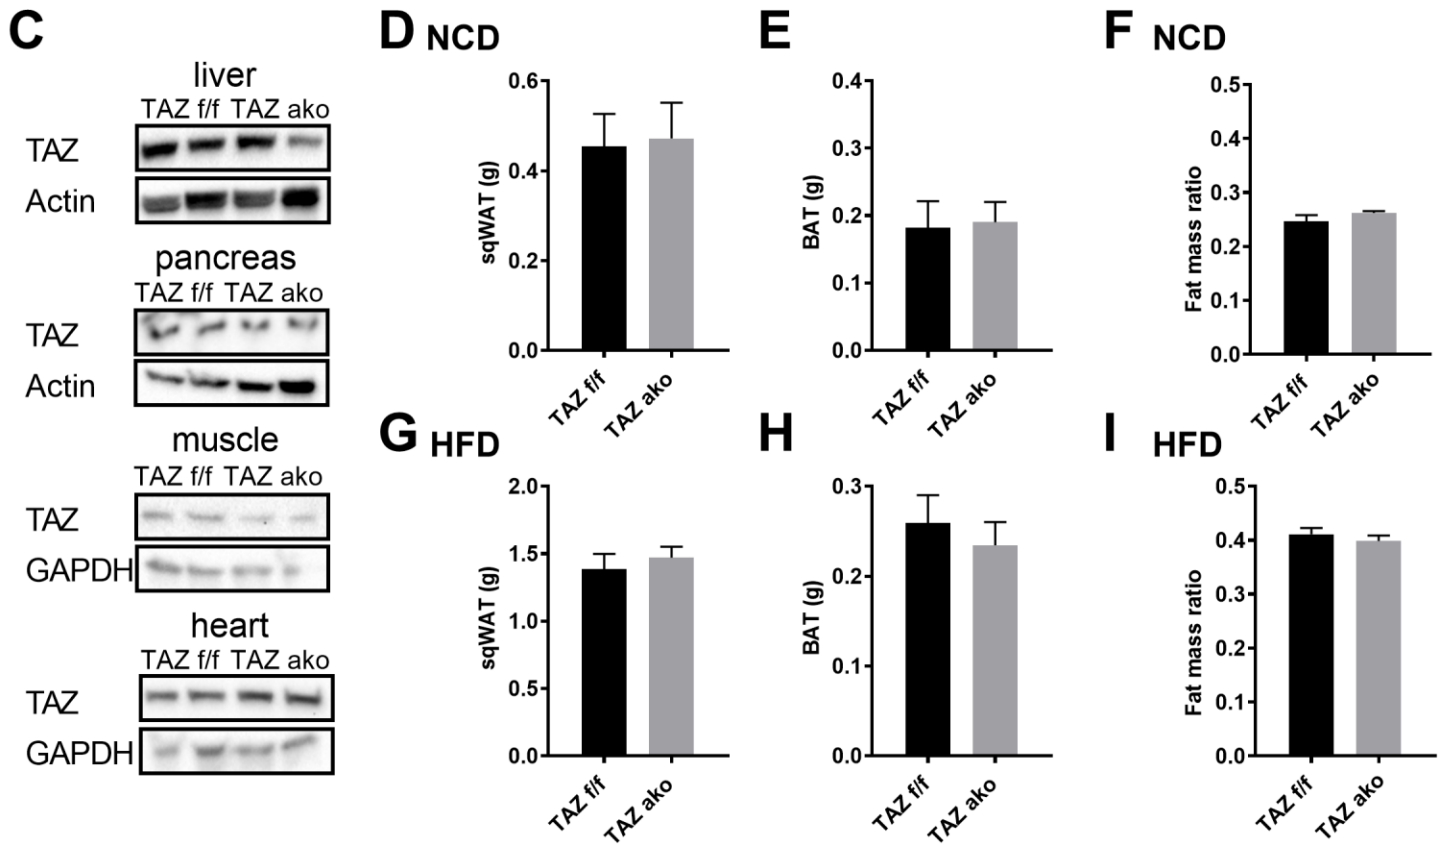

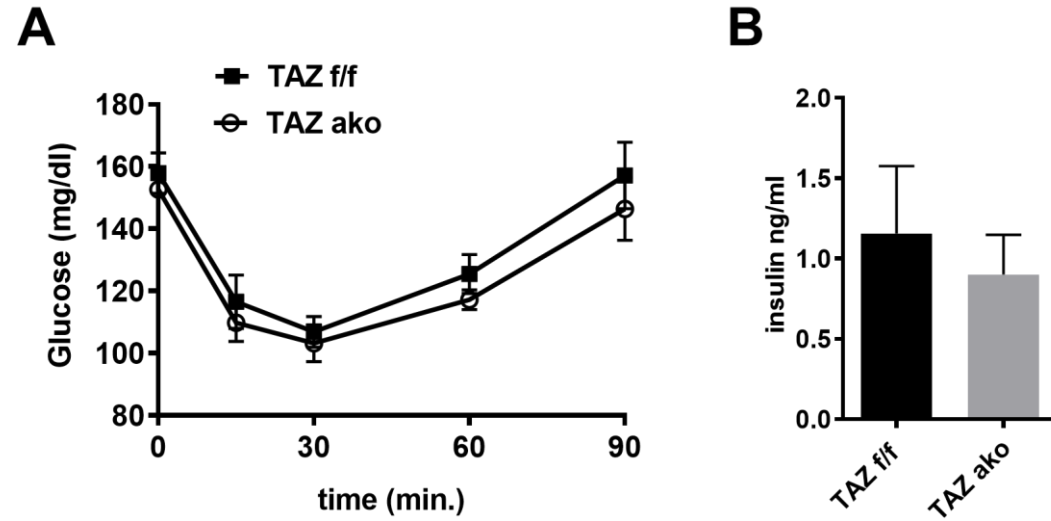

Figure S2. Related to Figure 2  
Insulin sensitivity and fasting insulin levels of f/f and AKO mice on HFD. (a) Insulin tolerance test. (b) Fasting insulin levels. Values are expressed as mean  $\pm$  SEM. n=8-11 mice/group.

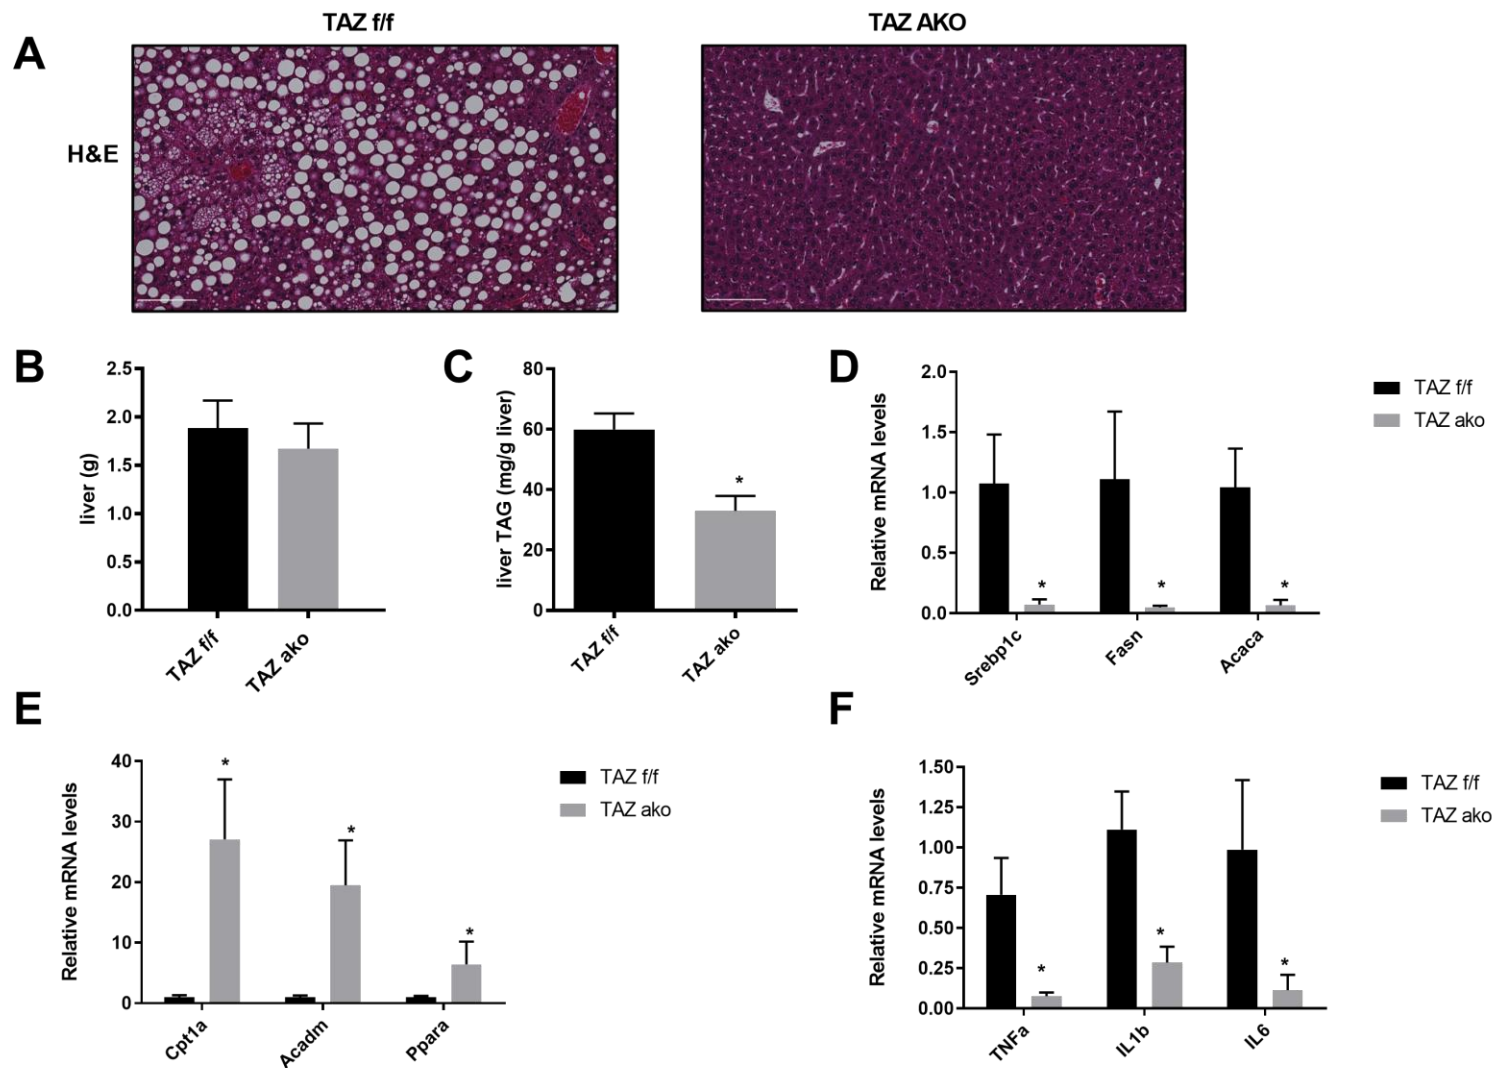

Figure S3. Related to Figure 2

AKO mice are characterized by less steatosis in the liver. (a) H&E staining of liver samples from TAZ AKO and TAZ f/f mice. (b) Liver weight in grams. (c) Liver TAG content. (d) mRNA levels of de novo lipogenesis genes in liver. (e) mRNA levels of  $\beta$ -oxidation genes in liver. (f) mRNA levels of inflammatory genes in liver. Values are expressed as mean  $\pm$  SEM, n=5-6 mice/group in (a-f) \*  $p < 0.05$ , for TAZ AKO vs f/f.

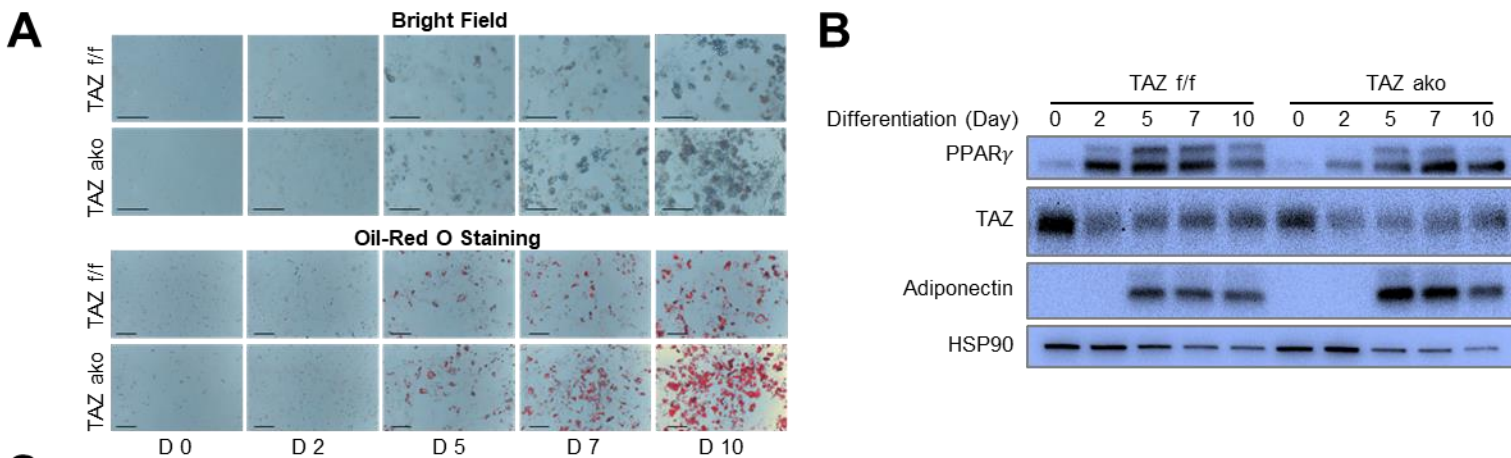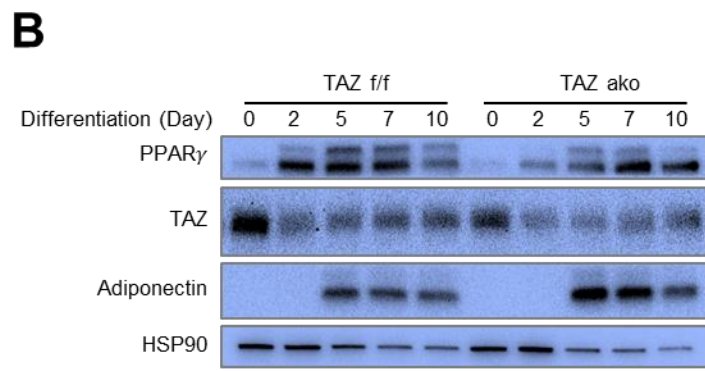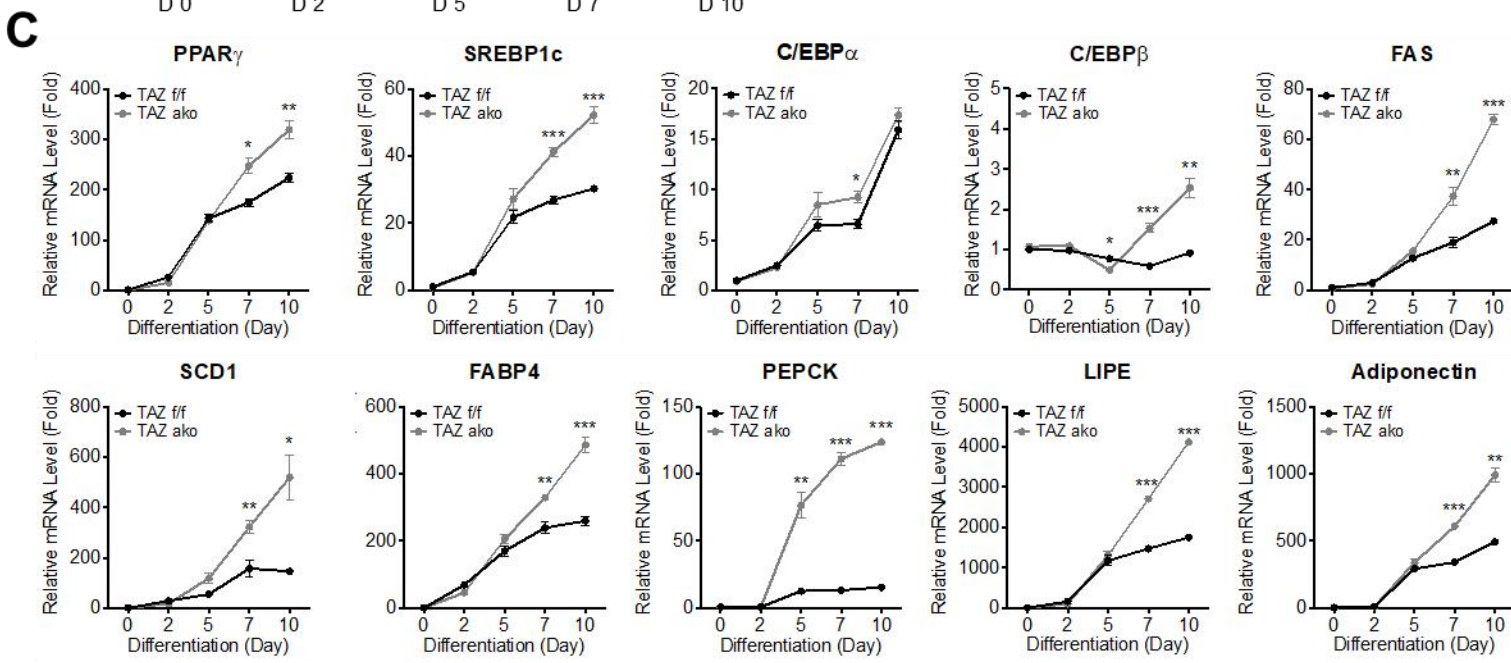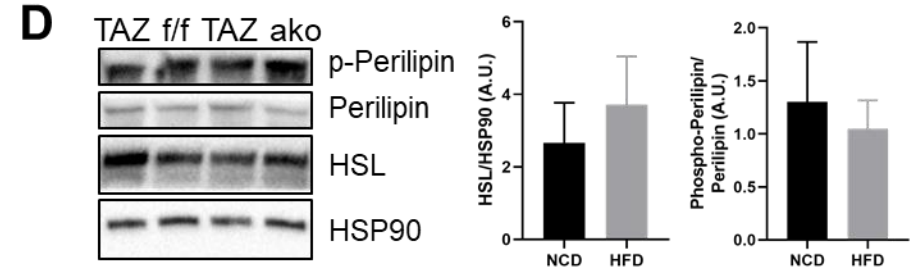

Figure S4. Related to Figure 3  
 Adipocyte differentiation of primary pre-adipocytes. Isolated primary preadipocytes from subcutaneous fat from TAZ f/f and TAZ ako mice were differentiated into adipocytes. (a) Microscopic pictures were taken with or without Oil-Red O staining at the indicated time points. Scale bar, 200  $\mu$ m. (b) The protein expression of PPAR $\gamma$ , TAZ, and adiponectin were measured by Western blot analysis. (c) The mRNA levels of both adipogenic and lipogenic genes were measured by quantitative real-time PCR (n=4). (d) The protein expression of phospho-Perilipin and HSL in HFD mice was measured by Western blot analysis (n=3-5). \*p<0.05, \*\*p<0.01, \*\*\*p<0.001 vs control. Data are presented as mean +/- SEM.

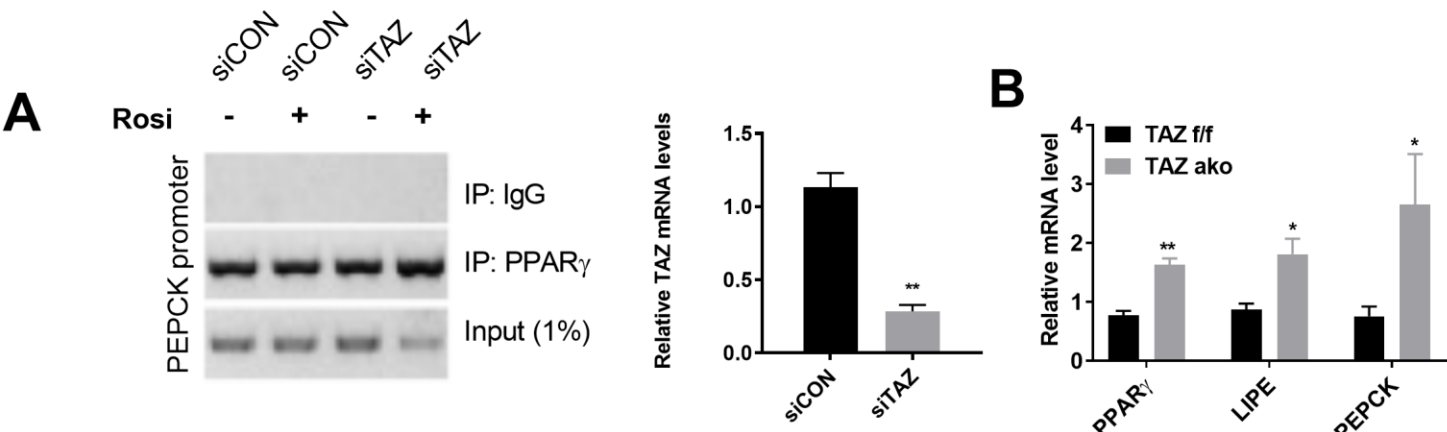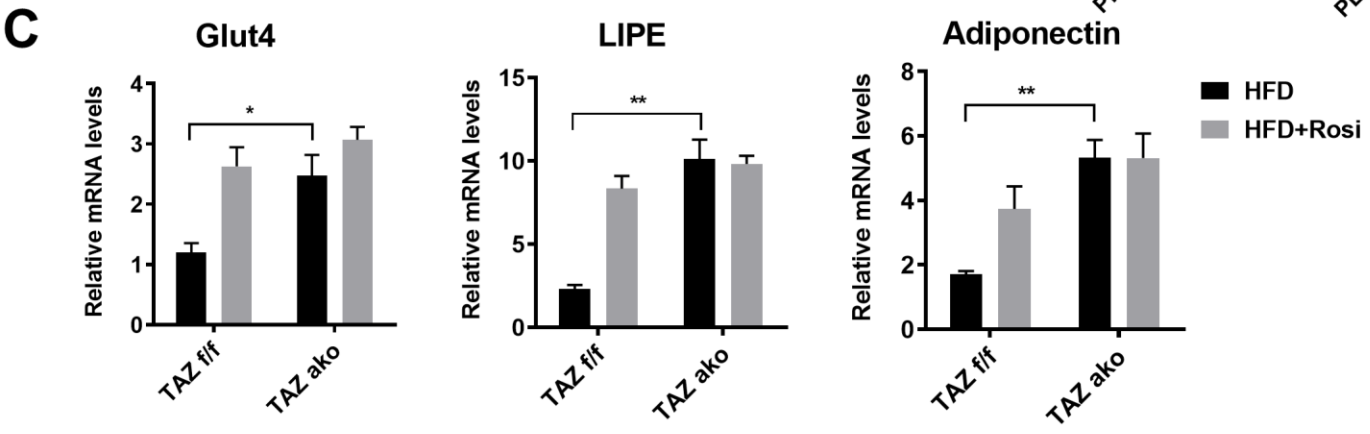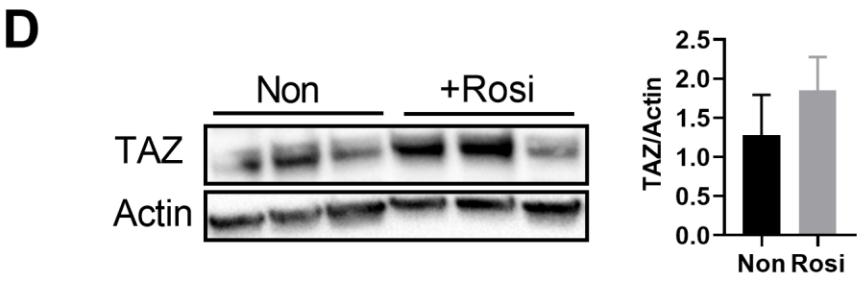

**Figure S5. Related to Figure 5.**

**The effects of TAZ AKO on PPAR activity.** (a) Chromatin immunoprecipitation (ChIP) of control IgG or PPAR $\gamma$  from 3T3-L1 adipocytes in the presence or absence of Rosiglitazone and transfected with TAZ and non-targeting siRNAs. Left panel, PCR products of PPRE element in the PEPCK promoter. Right panel, the silencing efficiency of TAZ gene (b) Adipogenic gene and PPAR $\gamma$  target genes expression levels in scWAT from HFD mice. (c) mRNA levels of upregulated genes responsive to PPAR $\gamma$  agonist rosiglitazone in eWAT. (d) TAZ expression in HFD (12 weeks) mice with and without rosi treatment (n=4 mice/group). Values are expressed as mean  $\pm$  SEM. \*p<0.05, \*\*p< 0.01.



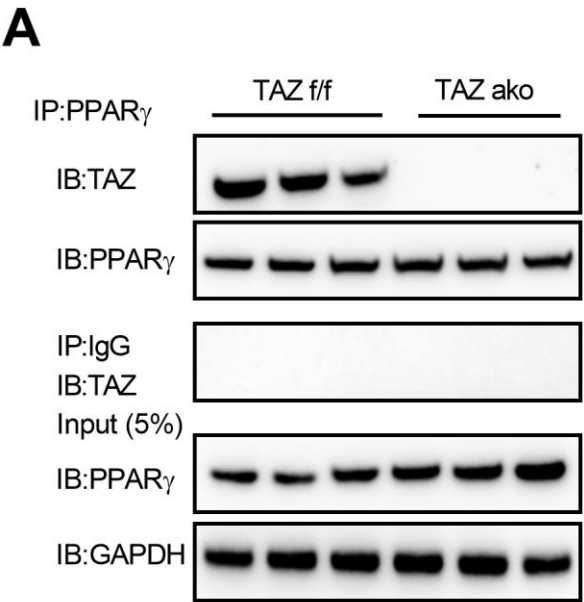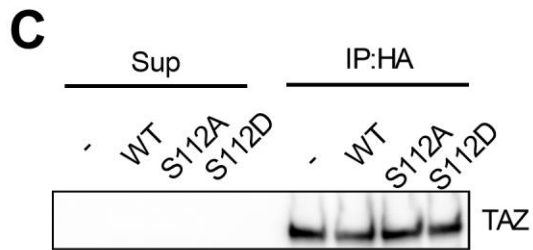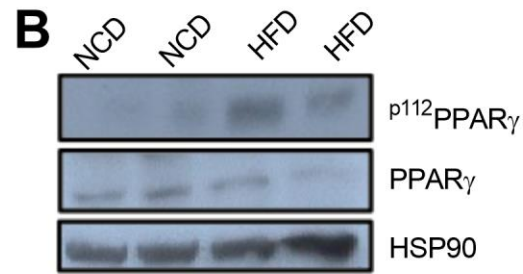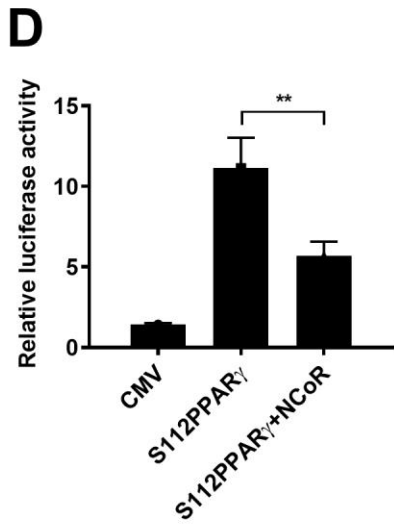

**Figure S6. Related to figure 6.**

**The effects of TAZ AKO on PPAR activity.** (a) Co-IP of PPAR $\gamma$  followed by TAZ immunoblotting (b) Phospho-PPAR $\gamma$  Ser112 (p-PPAR $\gamma$ ) and PPAR $\gamma$  levels in eWAT from normal chow and high-fat diet wildtype mice. (c) IP efficiency of HA-TAZ when co-transfected with or without PPAR $\gamma$  WT or mutants in U2-OS cells. (d) Transcriptional repression effect of NCoR on S112A mutant PPAR $\gamma$ -driven gene transcription in dual luciferase reporter assay. Values are expressed as mean  $\pm$  SEM. \*p<0.05, \*\*p< 0.01.

**Table S1. Related to Figures 1, 4, 5, S3, S4 and S5.**

List of primers used for real time PCR analysis in this study.

|                                | <b>Forward primer (5'-3')</b> | <b>Reverse primer (5'-3')</b> |
|--------------------------------|-------------------------------|-------------------------------|
| <b>36B4</b>                    | TGGCCA ATAAGGTGCCAGCTGCTG     | CTTGTCTCCAGTCTTTATCAGCTGCAC   |
| <b>ACC</b>                     | CTG ACGTATACTGAACTGGTGTGGATG  | TTTCCAGGCTACCATGCCAATCTC      |
| <b>Adiponectin</b>             | TGTTCTCTTAATCCTGCCCA          | CCAACCTGCACAAGTTCCTT          |
| <b>CD11c</b>                   | ACACAGTGTGCTCCAGTATGA         | GCCCAGGGATATGTTACAGC          |
| <b>C/EBPa</b>                  | GCGGGCAAAGCCAAGAA             | GCGTTCGCCGTACC                |
| <b>C/EBPb</b>                  | CAACCTGGAGACGCAGCACAAG        | GCTTGAACAAGTTCGGCAGGGT        |
| <b>F4/80</b>                   | CTTTGGCTATGGGCTTCCAGTC        | GCAAGGAGGACAGAGTTTATCGTG      |
| <b>FABP4</b>                   | GGATTTGGTCACCATCCGGT          | CCAGCTTGTACCATCTCGT           |
| <b>FAS</b>                     | CCAGACAGAGAAGAGCCA TGGAGG     | CCAATGAGGTTGCCCAGAACTCC       |
| <b>fasn</b>                    | GGAGGTGGTGATAGCCGGTAT         | TGGGTAATCCATAGAGCCCAG         |
| <b>GAPDH</b>                   | AA TGTGTCCGTCGTGGA TCT        | CATCGAAGGTGGAAGAGTGG          |
| <b>Glut4</b>                   | CAATGGTTGGGAAGGAAAAGGGCTA     | GTAGGCGCCAATGAGGAACCGTC       |
| <b>IL-1<math>\beta</math></b>  | AAATACCTGTGGCCTTGGGC          | CTTGGGA TCCACACTCTCCAG        |
| <b>IL-6</b>                    | CCAGAGATACAAAGAAATGATGG       | ACTCCAGAAGACCAGAGGAAAT        |
| <b>IL-10</b>                   | TGAA TTCCTGGGTGAGAAG          | TCACTTTCACCTGCTCCACT          |
| <b>iNOS</b>                    | GAGGCCAGGAGGAGAGATCCG         | TCCA TGCAGACAACCTTGGTGTG      |
| <b>LIPE</b>                    | GGGAGCTCCAGTCGGAAGA           | AACAGTTGGCCTAGGGTTGG          |
| <b>LPL</b>                     | GCCCAGCAACATTATCCAGT          | GGTCAGACTTCTGCTACGC           |
| <b>MCP-1</b>                   | AGGTCCTGTCA TGCTTCTG          | GCTGCTGGTGATCCTCTTGT          |
| <b>PEPCK1</b>                  | A TGAAGTTTGA TGCCCAAGGCAAC    | GGATTTGTCTTCACTGAGGTGCC       |
| <b>Plin1</b>                   | TCCACCCAGTTCACAGCTTGC         | GATGCTGTTCTTGGCGCTTC          |
| <b>PPAR<math>\alpha</math></b> | ATGAAGAGGGCTGAGCGTAG          | AAACGCAACGTAGAGTGCTGT         |
| <b>PPAR<math>\gamma</math></b> | GCATGGTGCCTTCGCTGA            | TGGCATCTCTGTGTCAACCATG        |
| <b>RGS2</b>                    | CCAAGGTCGAGGAGAAGCGGGAG       | GCGCTTCTCAGGAGAAGGCTG         |
| <b>SCD1</b>                    | TTCTTGCATACACTCTGGTGC         | CGGGATTGAATGTTCTTGTCTG        |
| <b>SREBP1c</b>                 | GCCGTGGTGAGAAGCGCACAGCCC      | CAAGACAGCAGATTTATTCAGCTTTC    |
| <b>TAZ</b>                     | ATGTCCGCTCGCACTCGTCG          | AGTGCGAGCGGACATGTTGG          |
| <b>TNF<math>\alpha</math></b>  | CCAGACCCTCACACTCAGATC         | CACTTGGTGGTTTGTACGAC          |
| <b>Ym1</b>                     | GGGCATACCTTTATCCTGAG          | CCACTGAAGTCA TCCA TGTC        |
